# Supplementary material for: Green Synthesis of Antibacterial Silver Nanocolloids with Agroindustrial Waste Extracts, Assisted by LED Light
Source: MDPI journal article supplement (doi:10.3390/colloids6040074), 2022-12-01
Supplement: s1 [file s1]

## Supporting Information

### Green Synthesis of Antibacterial Silver Nanocolloids with Agroindustrial Waste Extracts, Assisted by LED Light

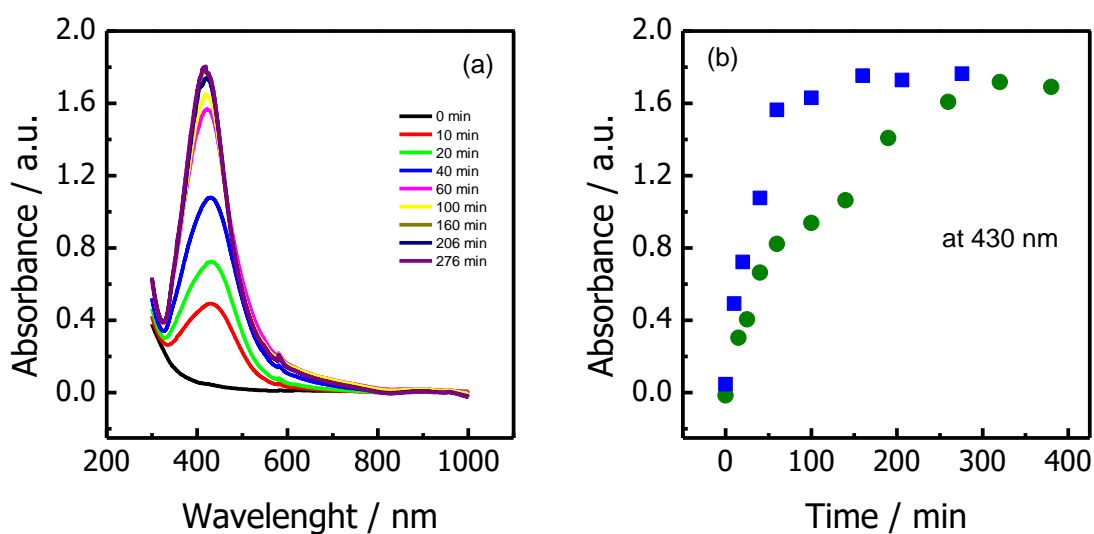

**Figure S1.** (a) UV-vis spectra of blue light irradiated samples at different times, (b) Absorbance at peak maxima versus time curves of mixture illuminated with different LED lights. (a and b: CPH extract).

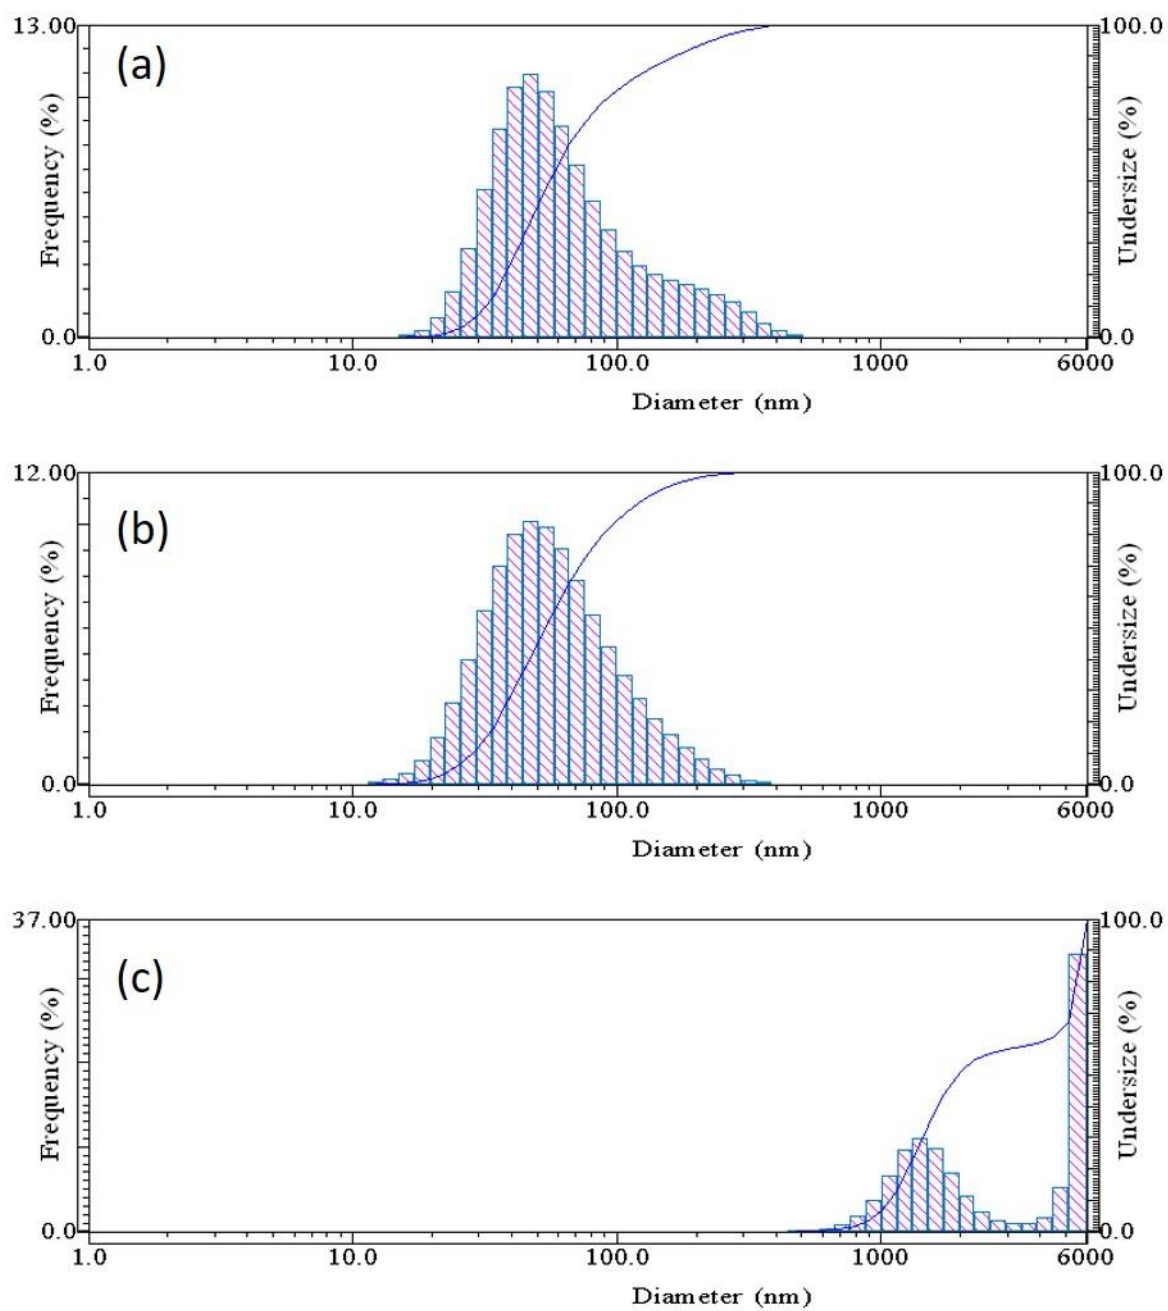

**Figure S2.** Particle size distribution curves of synthesized nanoparticles by DLS experimentation (a) AS, (b) CPH, and (c) OP extracts.

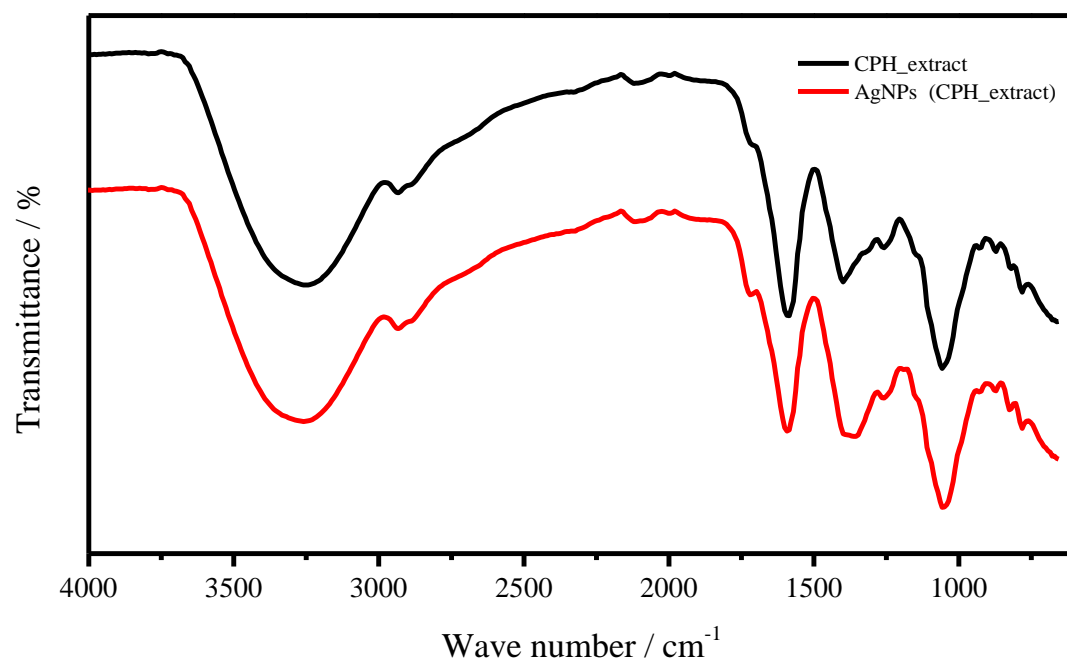

**Figure S3.** FTIR spectra of cocoa pod and AgNPs synthesized by blue light irradiation.
